# 1 Dual UTR-A novel 5' untranslated region design for 2 synthetic biology applications

3 Simone Balzer Le<sup>1,2</sup>, Ingerid Onsager<sup>1</sup>, Jon Andreas Lorentzen<sup>1,3</sup>, and Rahmi Lale<sup>1,\*</sup>

4 <sup>1</sup>PhotoSynLab, Department of Biotechnology, Faculty of Natural Sciences, Norwegian University of Science and  
5 Technology, N-7491 Trondheim, Norway

6 <sup>2</sup>Present address: SINTEF Industry, Materials and Chemistry, Dept. of Biotechnology and Nanomedicine, Postboks  
7 4760 Torgarden, N-7465 Trondheim, Norway

8 <sup>3</sup>Present address: Abbott Diagnostics Technologies AS, N-0424 Oslo, Norway

9 \*Corresponding author, rahmi.lale@ntnu.no

## 10 ABSTRACT

Bacterial 5' untranslated regions of mRNA (UTR) involve in a complex regulation of gene expression; however, the exact sequence features contributing to gene regulation are not yet fully understood. In this study, we report the design of a novel 5' UTR, dual UTR, utilising the transcriptional and translational characteristics of 5' UTRs in a single expression cassette. The dual UTR consists of two 5' UTRs, each separately leading to either increase in transcription or translation of the reporter, that are separated by a spacer region, enabling *de novo* translation initiation. We rationally create dual UTRs with a wide range of expression profiles and demonstrate the functionality of the novel design concept in *Escherichia coli* and in *Pseudomonas putida* using different promoter systems and coding sequences. Overall, we demonstrate the application potential of dual UTR design concept in various synthetic biology applications ranging from fine-tuning of gene expression to maximisation of protein production.

Keywords: 5' untranslated region, transcription, translation, *Escherichia coli*, *Pseudomonas putida*

## 12 Introduction

13 The DNA region corresponding to the 5' untranslated region of mRNA (UTR) plays a central role in gene and protein  
14 expression. At the DNA level, it is involved in transcript formation due to the interplay between promoter and the  
15 initially transcribed sequences (ITS), which covers the first 15 nt in *Escherichia coli*<sup>1-3</sup>. At the mRNA level, it  
16 influences transcript stability and translation because of secondary structure formation<sup>4-6</sup>, interaction with external  
17 factors i.e. proteins<sup>7</sup>, metabolites<sup>8,9</sup> and short RNAs<sup>10</sup> in addition to ribosome binding and translation initiation<sup>11</sup>.  
18 The translation initiation mainly involves around 15 nt preceding the start codon<sup>12</sup> including the Shine-Dalgarno  
19 (SD) sequence as well as the 5' end of the following coding sequence<sup>4</sup>. In bacteria, transcription and translation are  
20 coupled and a physical link between transcript formation and transcript turnover (translation and mRNA degradation)  
21 has been shown<sup>13</sup>. It has been reported that the translation rate is likely to affect the transcription rate which  
22 indirectly affects mRNA stability<sup>14-17</sup>. The DNA sequence of the 5' UTR has also an under-recognised role on  
23 transcript formation involving nucleotides downstream of the ITS<sup>18,19</sup>. With all the above mentioned characteristics,  
24 5' UTR is one crucial contributor to the maintenance of a fine balance between transcription, transcript stability, and

25 translation.

26 In synthetic biology applications, it is desirable to have a predictive control over the levels of gene expression<sup>20–22</sup>.  
27 Currently, there are several *in silico* tools available enabling the design of synthetic 5' UTR sequences for efficient  
28 translation initiation<sup>15,23–25</sup>, and these are also applied in combination with a selection of promoters<sup>15,22,26</sup>. However,  
29 because of 5' UTRs sequence proximity both to promoter and coding sequence regions a physical context dependency  
30 exists<sup>27</sup>, and it has consequently proven difficult to design optimal 5' UTR sequences solely based on translational  
31 properties<sup>15</sup>. The multiple functionalities overlapping in 5' UTRs, hence represents an optimisation challenge for  
32 modular design of biological circuitry.

33 We previously constructed a 5' UTR plasmid DNA library in which a 22 nt stretch, of the 32 nt long 5' UTR  
34 DNA sequence upstream of a  $\beta$ -lactamase coding sequence was randomly mutagenised using synthetic degenerate  
35 oligos<sup>18</sup>. *E. coli* cells harbouring the plasmid DNA library was screened for clones that showed increased ampicillin  
36 resistance at the induced state ( $\beta$ -lactamase production positively correlates with the host's ampicillin resistance)  
37 with each clone carrying a unique 5' UTR variant. *E. coli* clones could be categorised into two distinct groups based  
38 on their increased ampicillin resistance phenotype: one group of clones with increased reporter translation, high  
39 translation rates per reporter transcript; and another group of clones with increased reporter transcription phenotype  
40 but not corresponding translation, low translation rates per reporter transcript<sup>18</sup>. The 5' UTR variants were identified  
41 as a result of screening efforts using a single 5' UTR, and the screening would not allow the identification of specific  
42 5' UTRs with respect to the reporter transcription or translation rate. With these observations we speculated that  
43 the DNA sequence composition of a single 5' UTR leads to a compromise between transcriptional and translational  
44 processes; hence it might not be possible to identify a sequence composition that is optimised for both of these  
45 processes in a short 5' UTR sequences.

46 In this study, we designed new functional screening tools (bicistronic artificial operons) to identify 5' UTR  
47 variants with desired transcriptional and translational characteristics. We constructed dual UTRs by incorporating  
48 the identified 5' UTRs in a single expression cassette. We then demonstrate that the combination of 5' UTRs with  
49 transcriptional and translational characteristic can have a synergistic effect on the gene and protein expression  
50 beyond the expression levels achieved with single 5' UTRs. We demonstrate the functionality of the dual UTR  
51 concept in *Escherichia coli* and in an emerging SynBio chassis *Pseudomonas putida*<sup>28</sup>.

## 52 Results

### 53 Design, construction and screening of artificial operon plasmid DNA libraries

54 Initially, we sought to determine whether it would be possible to identify 5' UTR variants that specifically lead  
55 either to increased reporter gene or protein expression. We designed two (bicistronic) artificial operons: pAO-Tr  
56 and pAO-Tn (p: plasmid; AO, artificial operon; Tr, transcription; Tn, translation), to identify 5' UTR sequences  
57 that specifically lead to increased expression of  $\beta$ -lactamase at the mRNA and protein levels, respectively. Both  
58 artificial operons harbour the phosphoglucosyltransferase encoding sequence, *celB*, as the first gene; a spacer region;  
59 and the  $\beta$ -lactamase encoding sequence, *bla*, as the second gene (Figure 1). The *celB* gene was chosen as it can  
60 be efficiently transcribed and translated, hence would not introduce any undesired restrictions<sup>5</sup>; and the *bla* gene  
61 was chosen as host's resistance to ampicillin correlates with the produced amounts of  $\beta$ -lactamase, simplifying the

62 identification of clones with the desired phenotype<sup>18,29</sup>. As for the spacer region, it ensures that the translation of  
63 *bla* only occurs through *de novo* initiation as opposed to translational read-through<sup>5</sup>. The occurrence of *de novo*  
64 initiation was confirmed by eliminating the SD sequence upstream of *bla*, by replacing the SD sequence GGAG with  
65 CCTC, that led to abolished  $\beta$ -lactamase expression (results not shown). Expression in both artificial operons are  
66 driven by the positively regulated *XylS/Pm* regulator/promoter system, and a plasmid with the broad-host range  
67 mini-RK2 replicon is used as a vector in both constructs<sup>30</sup>.

68 Next, a 34 nt long oligo, with 22 nt degenerate nucleotide composition, was used for the construction of two  
69 5' UTR plasmid DNA libraries. For the transcriptional screening, using pAO-Tr (plasmid maps are provided as  
70 supplementary materials), a plasmid DNA library was constructed by cloning the degenerate oligo upstream of the  
71 first gene, *celB* (Figure 1a). Any observed increased expression of  $\beta$ -lactamase (detected as increased ampicillin  
72 resistance) would be as a consequence of increased transcription due to the presence of a particular 5' UTR variant.  
73 For the translational screening, using pAO-Tn, the same degenerate 5' UTR oligo was cloned upstream of the  
74 second gene, *bla* (Figure 1b). Any increased ampicillin resistance observed among the library clones would be as a  
75 consequence of increased *de novo* translation of the *bla* gene.

76 Finally for the screening, the recombinant *E. coli* clones harbouring the 5' UTR plasmid DNA libraries (~280,000  
77 and ~370,000 clones, in pAO-Tr and pAO-Tn, respectively) were plated on agar media containing 0.1 mM *m*-toluic  
78 acid (induces transcription from *Pm*) and ampicillin (ranging from 0.5 to 3.5 g/L). Multiple *E. coli* clones were  
79 isolated with increased ampicillin resistance phenotype, hypothesised to be either due to increased transcription  
80 (led to identification of Tr-UTR variants), or as a consequence of increased translation (led to identification of  
81 Tn-UTR variants). Identified clones could grow up to 2.5 g/L ampicillin in the presence of 0.1 mM *m*-toluic acid.  
82 To determine the 5' UTR DNA sequences that led to increased ampicillin resistance several clones were selected,  
83 plasmid DNAs isolated and sequenced. Among the identified clones (Supporting Online Material [SOM] Table  
84 S1) three Tr-UTRs r31, r36, r50 (Figure 2a), and four Tn-UTRs n24, n44, n47, n58 (Figure 2b) were randomly  
85 selected for further characterisation along with the wildtype (wt) 5' UTRs, and a previously identified 5' UTR variant,  
86 LV-2<sup>18</sup> (leading to increased transcription), summing up to five 5' UTRs in each category. To ensure that the initially  
87 observed ampicillin resistance levels were solely caused by the mutations within the identified 5' UTRs, synthetic  
88 oligonucleotides harbouring the identified mutations were synthesised and cloned back into pAO-Tr and pAO-Tn,  
89 and their ampicillin resistance phenotype were determined (Figure 2c). With the above mentioned screening and  
90 ampicillin resistance characterisations, we concluded that the artificial operons were suitable as a screening tool  
91 enabling the identification 5' UTR variants that specifically lead to either increased gene or protein expression.

## 92 Design and construction of dual UTR

93 The screening of the artificial operons gave us access to unique 5' UTR variants. Now having these 5' UTRs, we  
94 took a rational design approach and systematically combined them with the objective of benefiting from both  
95 the transcriptional and translational characteristic of 5' UTRs in a single dual UTR. A dual UTR consists of two  
96 unique 5' UTRs separated by a spacer region: the first 5' UTR proximal to the promoter is where we placed 5' UTRs  
97 originating from the transcriptional screening (Tr-UTR); the second 5' UTR is where we placed the 5' UTRs identified  
98 from the translational screening (Tn-UTR); while the spacer region provides enough space for physical separation

99 of mutations affecting transcription and translation (Figure 3a, SOM Figure S1). With this design concept, we  
100 constructed 25 dual UTRs (Figure 3b). In all 25 constructs, the dual UTRs were cloned downstream of the *Pm*  
101 promoter, and the entire expression cassette was resting on a plasmid with the broad-host range mini-RK2 replicon.

## 102 **Quantification of effects on gene and protein expression**

103 Initially, the ampicillin resistance phenotype of the *E. coli* clones each harbouring one of the 25 dual UTRs were  
104 characterised (Figure 3b). The observed ampicillin resistance levels indicated that all the dual UTR constructs  
105 were leading to increased reporter gene and protein expression as compared to expression levels reached with  
106 the wtwt dual UTR construct. A striking finding was that the observed ampicillin resistance phenotypes of the *E.*  
107 *coli* clones containing the dual UTR constructs were much higher than the resistance levels observed with the *E.*  
108 *coli* clones containing the individual Tr- and Tn-UTRs on their own (Figure 2c). This initial ampicillin resistance  
109 characterisations demonstrated that with the dual UTR design concept strong gene expression and high protein  
110 production can be achieved. It was also encouraging to observe that high expression levels could be reached by the  
111 combination of five Tr- and Tn-UTRs only.

112 Next, we sought to determine the reporter transcript and protein levels resulting from the dual UTR constructs.  
113 Four *E. coli* clones each harbouring one of the dual UTR constructs were grown under induced state and the  
114 transcript levels, by relative quantitative real-time reverse-transcription PCR (qPCR); and the enzymatic activities,  
115 by  $\beta$ -lactamase enzymatic activity assays, were determined (Figure 4a). The results obtained were in agreement with  
116 the design concept that r31, in r31wt dual UTR construct, led to increase in reporter transcript (despite moderate);  
117 while n47, in wtn47, led to 10-fold increase in *bla* transcript and a 42-fold increase in  $\beta$ -lactamase enzyme activity  
118 compared to the levels of expression reached with the wtwt dual UTR construct. Strikingly, the r31n47 dual UTR led  
119 to a high reporter gene and protein expression, 46- and 170-fold increase respectively, compared to the expression  
120 levels observed with the wtwt dual UTR construct. For quantitative comparison, we also calculated the translation  
121 efficiency for each construct by simply determining the protein-to-transcript ratio. Translation efficiencies were 1,  
122 0.6, 4.2, and 3.7 for the wtwt; r31wt; wtn47; and r31n47 dual UTR constructs, respectively. The observed translation  
123 efficiencies were in agreement with the dual UTR design concept that while r31 was leading to increased reporter  
124 transcription, hence lower translation efficiency; the n47 was leading to increased reporter translation, hence higher  
125 translation efficiency. Taken together, the increased expression observed with the r31n47 dual UTR construct was  
126 the result of synergistic effect of 5' UTRs with transcriptional and translational characteristics.

127 Next, the total cellular protein production was assessed by SDS-PAGE.  $\beta$ -lactamase could be visualised on the  
128 gel in the soluble fraction of sonicated cell lysates from clones harbouring constructs with the wtn47 and r31n47  
129 dual UTRs. The enzyme could also be visualised in the insoluble fraction from the r31n47 dual UTR construct  
130 (Figure 4b, upper panel). Specific detection of  $\beta$ -lactamase was also performed by Western blotting and the signal  
131 strengths correlated with the quantified enzymatic activities (Figure 4b, lower panel).

## 132 **Phenotypic quantification with a red fluorescent protein**

133 The Tn-UTR variants used in the dual UTR constructs were identified using the *bla* gene; therefore we were  
134 interested in testing to what extent the observed increased reporter gene expression was coding sequence (CDS)

135 specific. To assess the potential context dependency, the  $\beta$ -lactamase CDS was substituted with mCherry CDS,  
136 encoding for a red fluorescent protein, in wtwt, r31wt, wtn47 and r31n47 dual UTR constructs and mCherry transcript  
137 levels, fluorescent intensities and total proteins were quantified. Here we also calculated the translation efficiencies  
138 resulting from the four dual UTR constructs and the ratios were: 1, 0.5, 1.2, and 1.4 for the wtwt, r31wt, wtn47 and  
139 r31n47 dual UTR constructs, respectively. The phenotypic quantification with mCherry also indicate that r31 leads to  
140 increase in reporter transcription, whereas the n47 leads increase in reporter translation (Figure 5a). Correspondingly,  
141 the mCherry protein could also be easily visualised on an SDS-PAGE, both in the soluble and insoluble fraction,  
142 particularly from the r31n47 dual UTR construct (Figure 5b). These results indicate that the observed increase  
143 in expression was not CDS-specific. This finding indicates the suitability of the novel 5' UTR design concept for  
144 applications aiming for high levels of expression for instance heterologous protein production in bacteria.

### 145 ***In silico* design of Tn-UTRs**

146 The results reported so far indicate that a combination of 5' UTRs in a dual UTR can lead to strong gene and protein  
147 expression, at least for the two tested selection marker and reporter protein, *bla* and mCherry in *E. coli*, respectively.  
148 However, context dependency between 5' UTR sequences and CDS cannot be excluded if more genes are to be  
149 tested<sup>27</sup>. Therefore we applied a widely used *in silico* tool, the RBS calculator<sup>24</sup>, in designing Tn-UTRs that are  
150 specifically designed for the gene of interest to achieve high translation initiation rates (TIR, SOM Table S2). In  
151 the design, the *bla* and *mCherry* genes were used as reporters, and *E. coli* was chosen as the host. In total, six  
152 such designed Tn-UTRs were synthesised: three for the  $\beta$ -lactamase and three for the mCherry CDSs (named as  
153 dTn-UTRs). The predicted TIR values were 60- to 80-fold higher compared to n47-*bla*, and 50- to 70-fold higher  
154 compared to n47-*mCherry* (SOM Table S3). All six dTn-UTRs were cloned into the dual UTR either with the  
155 wt or the r31 at the Tr-position (Figure 6). The phenotypic characterisations revealed that all three dTn-UTRs  
156 with the *bla* gene led to a similar increase in expression levels achieved with the n47 combination (Figure 6a).  
157 Similar observations were also made for the construct with the *mCherry* gene: Tr-UTR r31 in combination with  
158 the dTn-UTRs led to 9- (dTn4) and 46-fold (dTn5 and dTn6) relative increase vs. 58-fold with the Tn-UTR n47  
159 (Figure 6b). These findings indicate that designed 5' UTRs can also be used in the dual UTR context, and even  
160 higher expression levels, beyond the predicted levels, can be achieved by the combination of designed Tn-UTRs  
161 with Tr-UTRs.

### 162 **Functionality assessment in an alternative host**

163 The broad-host range mini-RK2 replicon and the expression system XylS/*Pm* are both known to function in many  
164 Gram-negative bacteria<sup>31</sup> including *Pseudomonas* species. The emerging SynBio chassis, *P. putida*<sup>28</sup>, has the same  
165 anti-SD sequence within its 16S rRNA as *E. coli*. We therefore sought to assess the functionality of the dual UTR  
166 concept in *P. putida* strain KT2440. The dual UTR constructs wtwt, r31wt, wtn47 and r31n47 with the *mCherry*  
167 CDS were transferred to *P. putida* and the mCherry fluorescent intensities were quantified (Figure 7). The strong  
168 synergistic effect seen with dual UTR constructs in *E. coli* was also observed in *P. putida*. The relative expression  
169 levels reached among the dual UTR constructs were weaker in *P. putida* than the observed relative expression levels  
170 in *E. coli*. The reason for the relative weakness appeared to be due to the reference construct, wtwt, leading to

171 expression of mCherry at much higher levels in *P. putida* than in *E. coli* as judged by the stronger bands visualised  
172 on the SDS-PAGE gel (Figure 7b). The results obtained in *P. putida* indicates that the functionality of the dual UTR  
173 concept is not only limited to *E. coli*; hence in principle it can be used in a wide range of bacterial hosts.

#### 174 **Assessment of the positional effect**

175 The conceptualisation of dual UTR was the result of a rational design approach. The particular 5' UTRs were  
176 rationally placed in dual UTR given their transcriptional and translational characteristics which led to the synergistic  
177 effect resulting in high reporter gene and protein expression. Observing the synergistic effect on gene expression,  
178 we sought to determine whether the strong expression levels could also be achieved irrespective of the position of  
179 the 5' UTRs in dual UTR. To assess the positional effect on the observed phenotype, we constructed dual UTRs by  
180 placing the Tn-UTRs n47 and n58 in Tr-position, and the Tr-UTRs r31 and r50 in Tn-position. After the construction  
181 of the plasmids with TnTr dual UTR combinations we quantified the resulting fluorescent intensities under induced  
182 and uninduced states in *E. coli* (Figure 8). It was intriguing to observe that the synergistic effect observed with  
183 dual UTRs were position dependent as the dual UTRs with TnTr combinations were not leading to any significant  
184 expression at all.

#### 185 **Functionality assessment with an alternative promoter system**

186 Observing that the dual UTR was functional with another coding sequence, in another host, and the correct  
187 positioning of the 5' UTRs was necessary for the observed synergistic effect, we questioned whether the observed  
188 increase in gene and protein expression with dual UTRs was due to an emergent property of the *Pm* promoter.  
189 For this functionality assessment, we chose to substitute the *XylS/Pm* with the *AraC/P<sub>BAD</sub>* system in dual UTR  
190 constructs, both for the original design of TrTn as well as TnTr combinations. We characterised the phenotype of the  
191 *E. coli* clones by quantifying the fluorescent intensities resulting from each construct under induced and uninduced  
192 states after 5 and 18 hours (O/N) of growth. The results of this experiment made it clear that the synergistic effect  
193 observed in dual UTRs was not an emergent property of the *Pm* promoter as similar expression levels were also  
194 reached when we used the *P<sub>BAD</sub>* promoter in combination with dual UTRs, both for the TrTn and TnTr combinations.  
195 The dual UTR constructs, however, led to much higher background expression from the *P<sub>BAD</sub>* promoter in the  
196 absence of induction as compared to the expression levels achieved with the *Pm* promoter.

#### 197 **Transcript stability and translational arrest**

198 It has been reported that high translation rate (high ribosome occupancy) occurring on mRNA leads to protection  
199 of the mRNA against nucleotide degradation<sup>14–17</sup>. Given the high reporter transcript levels observed with the dual  
200 UTR constructs, we sought to determine the decay rates of the reporter transcripts originating from the dual UTR  
201 constructs, and relative presence of reporter transcripts under translational arrest. For determining the reporter  
202 transcript stability, we performed an inducer wash-out assay<sup>32</sup>. The wash-out assay relies on the passive diffusion  
203 characteristic of the *m*-toluic acid, inducer of the *XylS/Pm* system. *E. coli* clones were grown for 5 hours under  
204 induced state with 2 mM *m*-toluic acid and after this period of growth the growth medium was replaced with a fresh  
205 medium not containing the inducer, and five samples were taken with 2 minutes intervals. qPCR was performed on  
206 the samples and the mRNA decay rates were calculated for the four different dual UTR constructs (Figure 10). The

207 stability of the reporter transcript resulting from the dual UTRs appear to be correlated with the levels of protein  
208 expression for the wtn47 and r31n47 dual UTR constructs. While the observed lower stability for the reporter  
209 transcript from the r31wt does not correlate with the measured mCherry fluorescence intensities.

210 Next, we performed an translational arrest experiment by the addition of chloramphenicol to the growth medium  
211 that leads to peptidyl transferase inhibition of bacterial ribosome, hence hinders amino acid chain elongation. For  
212 this experiment the transcript and fluorescence intensities were measured under two conditions: (i) by the induction  
213 of expression only with 2 mM *m*-toluic acid, to serve as a control (I); (ii) by the addition of chloramphenicol to  
214 a final concentration of 100 µg/mL and followed by induction of expression with 2 mM *m*-toluic acid, to assess  
215 the accumulation of reporter transcript in the absence of translation (CI) (Figure 11a). The reporter transcript  
216 accumulation resulting from the r31n47 dual UTR construct is not negatively affected by the blocking of translation  
217 as the transcript levels remain similar as compared to the condition I (Figure 11b). Hence the observed transcript  
218 stability, determined by the decay rate experiment, is not due to the high translation observed in the r31n47 dual  
219 UTR construct. This same observation also holds true for the wtn47 dual UTR construct. One puzzling observation  
220 was the increased fluorescence accumulation resulting from the r31wt construct. The decay rate indicates that the  
221 reporter transcript is the least stable compared to the other three reporter transcripts resulting from the dual UTR  
222 constructs; however, r31wt still leads to protein accumulation in the presence of chloramphenicol. This observation  
223 points to the presence of an unknown biological process that still leads to protein accumulation in the presence of  
224 chloramphenicol.

## 225 Discussion

226 In this study, we present a novel 5' UTR design named dual UTR. The dual UTR concept both relies and benefits from  
227 the role of 5' UTRs in transcriptional and translational regulation in bacteria. For this study, we designed artificial  
228 operons to identify 5' UTRs that individually lead to increase in reporter transcription or translation. The combination  
229 of 5' UTRs in a single UTR led to the observation of a synergistic effect resulting in increased expression both at the  
230 level of reporter transcript and final protein. The strong gene expression levels achieved with dual UTRs point to the  
231 importance of the role of 5' UTRs in transcriptional regulation. Based on the mRNA decay and translational arrest  
232 experiments we speculate that the reporter transcript accumulations in dual UTR are not dependent on the translation  
233 events. This points to an important finding that reporter transcripts can be generated, by an unknown mechanism,  
234 that is not as a consequence of protection due to high ribosome occupancy. Further research directions will be on the  
235 study of single gene expression events by labelled RNA polymerase, and ribosome profiling to understand the role  
236 and influence of 5' UTRs in transcript accumulation, especially in relation to ribosome occupancy.

237 In synthetic biology applications 5' UTRs are utilised due to their involvement in translational regulation only.  
238 Therefore the functional role of 5' UTRs in transcriptional regulation has not been realised in the modular design of  
239 biological circuitry. In the biological circuitry design different levels of gene expression is achieved either by the  
240 use of native promoters, or variants thereof with different strength; or by the use of limited number of regulated  
241 promoters via differential induction levels. The use of plasmids with different copy-number has also been used as an  
242 another way of obtaining varied gene expression. Based on the experimental evidences reported in this study, we

243 envision that the dual UTR concept can also be used as a way to achieve transcriptional regulation in biological  
244 circuitry design. This is especially relevant for studies using (unconventional) host microorganisms for which there  
245 is a limited number of characterised promoters exist.

246 The dual UTR design concept is also suitable for applications where the introduction of expression cassettes from  
247 plasmid-based systems (multiple copies) to chromosomes (single copy) suffers from the reduction in gene dosage.  
248 Hence dual UTRs can be used, even in combination with strong promoters, to achieve maximum transcription rates  
249 from a single expression cassette.

250 To conclude, a 5' UTR involves in complex regulations both at the level of DNA and mRNA. The combination of  
251 Tr- and Tn-UTRs in dual UTR leads to a synergistic effect in gene and protein expression. The functionality of the  
252 dual UTR depends on the individual characteristics of the 5' UTRs, and the correct positioning of Tr- and Tn-UTRs  
253 is crucial for the observed synergistic effect. The dual UTR as a concept is functional with different promoters and  
254 coding sequences both in *E. coli* and *P. putida*. With these demonstrations we anticipate that the concept described  
255 here are universally applicable to achieve a precise control of expression in bacteria for various synthetic biology  
256 applications.

## 257 **Methods**

### 258 **Bacterial strains and growth conditions**

259 Recombinant *E. coli* DH5 $\alpha$  (Bethesda Research Laboratories), *E. coli* RV308 (ATCC 31608) and *P. putida* KT2440  
260 were cultivated in Lysogeny Broth (LB) (10 g/L tryptone, 5 g/L yeast extract and 5 g/L NaCl) or on Lysogeny Agar  
261 (LB broth with 15 g/L agar) supplemented with 50  $\mu$ g/mL kanamycin. Selection of *E. coli* DH5 $\alpha$  transformants was  
262 performed at 37 °C, while 30 °C was used for all growth experiments. For the induction of the promoter systems,  
263 first overnight cultures were inoculated into fresh medium and were grown until the mid-log phase was reached, and  
264 afterwards were induced at the levels specified.

### 265 **DNA manipulations**

266 Standard recombinant DNA procedures were performed as described by Sambrook and Russell<sup>33</sup>. DNA fragments  
267 were extracted from agarose gels using the QIAquick gel extraction kit and from liquids using the QIAquick PCR  
268 purification kit (QIAGEN). Plasmid DNA was isolated using the Wizard Plus SV Minipreps DNA purification kit  
269 (Promega) or the NucleoBond Xtra Midi kit (Macherey-Nagel). Synthetic oligonucleotides were ordered from  
270 Sigma-Aldrich or Eurofins. Restriction cloning was performed according to recommendations from New England  
271 Biolabs. PCR reactions were carried out with the Expand High Fidelity PCR System (Roche Applied Science) or Q5  
272 High-Fidelity DNA Polymerase (NEB). *E. coli* clones were transformed using a modified RbCl protocol (Promega)  
273 and *P. putida* KT2440 was transformed using an electroporation protocol described by Hanahan and colleagues<sup>34</sup>.  
274 The constructed plasmids were confirmed by sequencing performed at Eurofins/GATC Biotech using primer 5'-AAC  
275 GGCCTGCTCCATGACAA-3' for pAO-Tr-, pIB11-<sup>18</sup>, pdualUTR-; and primers 5'-CTTTCACCAGCGTTTCTGG  
276 GTG-3' and 5'-CAAGGATCTTACCGCTGTTG-3' for pAO-Tn-based constructs.



## 277 Plasmid constructions

278 All plasmids are based on the broad-host range mini-RK2 replicon. For the construction of the pAO-Tr plasmid,  
279 the *bla* coding sequence was amplified from the plasmid pIB11<sup>18</sup> with the primers 5'-GCAGGCGGAATTCTA  
280 ATGAGGTCATGAACTTATGAGTATTCAACATT-3' and 5'-CTAGAGGATCCCCGGGTACCTTTTCTACG  
281 G-3', introducing the restriction sites EcoRI and BamHI, and was cloned into the pIB22<sup>35</sup> plasmid as EcoRI-BamHI  
282 fragment downstream of the *celB* gene. This construction resulted in the plasmid pAO-Tr (SOM pAO-Tr.gb).

283 For the construction of pAO-Tn, the *celB* coding sequence and the DNA sequence corresponding to its 5' UTR  
284 were PCR amplified from the pAO-Tr plasmid using the primer pair 5'-ACCCCTTAGGCTTTATGCAACAgaaAC  
285 AATAATAATGGAGTCATGAACtTATG-3' and 5'-CTTTCACCAGCGTTTCTGGGTG-3'. The resulting PCR  
286 product was digested with Bsu36I and EcoRI and re-introduced into pAO-Tr using the same restriction sites leading  
287 to pAO-Tn(-1). By this cloning, the additional NdeI and PciI restriction sites were removed (indicated by small  
288 letters). The *bla* coding sequence was PCR amplified from pIB11 using the primer pair 5'-cggattCAACATGTA  
289 CAATAAAtatg-3' and 5'-AGCTAGAGGATCCCCGGGTGTA-3' and the resulting PCR product was cloned as an  
290 EcoRI-BamHI fragment into the pAO-Tn(-1) plasmid resulting in pAO-Tn (SOM pAO-Tn.gb).

291 For the individual characterisation of Tr- and Tn-UTR's phenotype, 5' UTR DNA sequences were integrated  
292 between the unique PciI and NdeI sites in the plasmid pIB11 as annealed pairs of forward and reverse synthetic  
293 oligonucleotides.

294 For the construction of plasmids carrying the dual UTRs, pdualUTR (SOM pdualUTR.gb), the native 5' UTR  
295 DNA sequence upstream of the *bla* coding sequence in pIB11 was substituted with the annealed oligonucleotides  
296 5'-CATGTACAATAATAATGGAGTCATGAACATATCTTCATGAGCTCCATTATTATTGTATATGTACAA  
297 TAATAATGGAGTCATGAACA-3' and 5'-TATGTTTCATGACTCCATTATTATTGTACATATAACAATAATA  
298 ATGGAGTCATGAAGATATGTTTCATGACTCCATTATTATTGTA-3'.

299 For the construction of pdualUTR with the *mCherry* reporter gene an *E. coli* codon-optimized variant of the  
300 *mCherry* coding sequence (a gift from Yanina R. Sevastyanovich, University of Birmingham) was PCR-amplified  
301 using primer pair 5'-GCTGCATATGGTTTCTAAAGGTGAAGAAG-3' and 5'-GCTCGGATCCTTATCATTATA  
302 CAGTTCGTCACATAC-3' and digested with NdeI and BamHI. The digested fragment was then used to replace the  
303 *bla* coding sequence in pdualUTR resulting in pdualUTR-mCherry (SOM pdualUTR-mCherry.gb).

304 For the construction of all dualUTR combinations annealed synthetic oligonucleotides flanked by PciI and SacI  
305 (Tr-dual UTR) and SacI and NdeI (Tn-dual UTR) sticky ends were inserted into pdualUTR or pdualUTR-mCherry  
306 using the respective restriction enzyme recognition sites.

307 For the construction of the  $P_{BAD}$  system, the  $P_{BAD}$  expression cassette was PCR amplified from pSB-B1b<sup>36</sup>  
308 using primer pairs 5'-ATGGAGAAACAGTAGAGAGTTG-3' and 5'-TACATGGCTCTGCTGTAG-3'. Each of  
309 the five pdualUTR-mCherry vectors were PCR amplified using the reverse primer 5'-CTCCCGTATCGTAGTT  
310 ATC-3' in combination with one of the forward primers 5'-CAACTCTCTACTGTTTCTCCATAACATGTTA  
311 CCATGATAATGGAG-3', 5'-CAACTCTCTACTGTTTCTCCATAACATGTTACAATAATAACGGAGTCA  
312 TG-3', 5'-CAACTCTCTACTGTTTCTCCATAACATGTAATAAACTAAAGGAGTTATG-3' 5'-CAACTCTCT  
313 ACTGTTTCTCCATAACATGTACAATAATAATGGAGTCATGAACATATC-3' each targeting the dual UTR  
314 region in r31n47, r50n47, n47r31/n47r50, and wtwt respectively. The DpnI treated and purified PCR-products with

315 overlapping ends were assembled using *in vivo* homologous recombination method in *E. coli* strain DH5 $\alpha$ , leading  
316 to pdualUTR-PBAD-mCherry (SOM pdualUTR-PBAD-mCherry.gb). The correct constructs were confirmed by  
317 sequencing using the reverse primer binding to the mCherry coding sequence, 5'-GATGTCAGCCGGGTGTTTAA  
318 C-3'.

### 319 **Generation and screening of 5' UTR libraries based on pAO-Tr and pAO-Tn**

320 5' UTR libraries were constructed in pAO-Tr and pAO-Tn by cloning the synthetic degenerate oligonucleotides  
321 between their respective NdeI and PciI restriction sites, as described previously<sup>18,30</sup>. After transformation of  
322 plasmid DNAs to *E. coli* DH5 $\alpha$ , libraries with ~280,000 transformants (pAO-Tr-based) and ~370,000 transformants  
323 (pAO-Tn-based) were generated.

### 324 **$\beta$ -lactamase expression analysis**

325  $\beta$ -lactamase enzymatic assay was performed following the protocol described elsewhere<sup>37</sup>. For protein production  
326 analysis by SDS-PAGE or Western blot, *E. coli* RV308 was used. *E. coli* RV308 clones were grown in super broth  
327 (32 g/L peptone, 20 g/L yeast extract and 5 g/L NaCl). Expression was induced in the mid-log phase and cultures  
328 were harvested 5 hours after induction with 2 mM *m*-toluic acid. 0.1 g pellet (wet weight) were washed with 0.9%  
329 NaCl and resuspended in 1.5 mL lysis buffer (25 mM Tris-HCl, pH 8.0, 100 mM NaCl, 2 mM EDTA) followed  
330 by incubation with 0.2 g/L lysozyme on ice for 45 min and sonication (3 min, 35% duty cycle, 3 output control).  
331 After addition of 10 mM MgCl<sub>2</sub> and treatment with 125 U Benzonase Nuclease (Sigma-Aldrich) for 10 min, the  
332 lysate was centrifuged to separate the soluble supernatant fraction from the pellet. The insoluble pellet fraction was  
333 resuspended in 1.5 mL lysis buffer. Both fractions were run on an SDS-PAGE using 12% ClearPage<sup>TM</sup> gels and  
334 ClearPAGETM SDS-R Run buffer (C.B.S. Scientific) followed by staining with Coomassie Brilliant blue R-250  
335 (Merck). Western blot analysis was performed as described elsewhere<sup>33</sup>.

### 336 **mCherry production analysis**

337 mCherry activity was determined with an Infinite M200 Pro multifunctional microplate reader (Tecan) by measuring  
338 the fluorescence of 100  $\mu$ L untreated culture with excitation and emission wavelengths of 584 nm (9 nm bandwidth)  
339 and 620 nm (20 nm bandwidth), respectively, and normalisation against absorbance reading at OD<sub>600</sub>. Three  
340 bacterial colonies from each of the dual UTR constructs were transferred into a 96-well plate (Corning, black, flat  
341 bottom, clear) with each well containing 100  $\mu$ L LB with kanamycin. *E. coli* clones were grown until they reached  
342 mid log-phase and were induced either with L-arabinose to a final concentration of 0.2% or with *m*-toluic acid at  
343 concentrations specified. The induced cultures were grown for 5 and/or 18 hours (O/N) as specified in the main text.

### 344 **Transcript analysis**

345 To relatively quantify *bla* and *mcherry* transcripts, *E. coli* RV308 clones were cultivated as described above. For  
346 RNA decay studies, *E. coli* clones with dual UTR constructs were grown until the cultures reached the mid-log  
347 phase and were harvested 5 hours after induction with 2 mM *m*-toluic acid. Samples for transcript analysis were  
348 taken 2, 4, 6, 8, and 10 min after filtration following the wash-out protocol<sup>32</sup>. Cell cultures were treated with RNA  
349 protect (Qiagen) to stabilise RNA. RNA isolation, DNase treatment, cDNA synthesis, and qRT-PCR were performed

350 according to protocols described elsewhere<sup>18</sup>. The following primer pairs were used in qPCR: for *bla* (5'-ACGTTTT  
351 CCAATGATGAGCACTT-3' and 5'-TGCCCGGCGTCAACAC-3'); for mCherry (5'-CGTTCGCTTGGGACAT  
352 CCT-3' and 5'-GATGTCAGCCGGGTGTTAAC-3'), and for 16S rRNA (5'-ATTGACGTTACCCGCAGAAGA  
353 A-3' and 5'-GCTTGCACCCTCCGTATTACC-3').

### 354 RBS calculator details

355 Translation initiation rates were determined using the reverse engineering function of the RBS calculator<sup>24</sup>. The  
356 sequence input for the RBS calculator consisted of the 5' UTR DNA sequence (up to 50 nt) and the first 50 nt of the  
357 *bla* or *mcherry* coding sequence. 5' UTRs with optimal translational features were generated applying the forward  
358 engineering function of the RBS calculator using the following template sequence 5'-GAGCTCCATTATTATTGT  
359 ATATGTnnnnnnnnnnnnnnnnnnnnnnnnnnnnnnnnnnT-3'.

### 360 References

- 361 1. Craig, M. L. *et al.* DNA footprints of the two kinetically significant intermediates in formation of an RNA  
362 polymerase-promoter open complex: evidence that interactions with start site and downstream DNA induce  
363 sequential conformational changes in polymerase and DNA. *J Mol Biol* **283**, 741–56, DOI: [S0022-2836\(98\)](https://doi.org/10.1006/jmbi.1998.2129)  
364 [92129-5\[pii\]10.1006/jmbi.1998.2129](https://doi.org/10.1006/jmbi.1998.2129) (1998).
- 365 2. Goldman, S. R., Ebright, R. H. & Nickels, B. E. Direct detection of abortive RNA transcripts in vivo. *Science*  
366 **324**, 927–8, DOI: [324/5929/927\[pii\]10.1126/science.1169237](https://doi.org/10.1126/science.1169237) (2009).
- 367 3. Hsu, L. M. *et al.* Initial transcribed sequence mutations specifically affect promoter escape properties. *Biochem-*  
368 *istry* **45**, 8841–54, DOI: [10.1021/bi060247u](https://doi.org/10.1021/bi060247u) (2006).
- 369 4. Kudla, G., Murray, A. W., Tollervey, D. & Plotkin, J. B. Coding-sequence determinants of gene expression in  
370 *Escherichia coli*. *Science* **324**, 255–8, DOI: [324/5924/255\[pii\]10.1126/science.1170160](https://doi.org/10.1126/science.1170160) (2009).
- 371 5. Osterman, I. A., Evfratov, S. A., Sergiev, P. V. & Dontsova, O. A. Comparison of mRNA features affecting  
372 translation initiation and reinitiation. *Nucleic Acids Res* **41**, 474–86, DOI: [gks989\[pii\]10.1093/nar/gks989](https://doi.org/10.1093/nar/gks989)  
373 (2012).
- 374 6. de Smit, M. H. & van Duin, J. Control of prokaryotic translational initiation by mRNA secondary structure.  
375 *Prog Nucleic Acid Res Mol Biol* **38**, 1–35 (1990).
- 376 7. Hajnsdorf, E. & Boni, I. V. Multiple activities of RNA-binding proteins S1 and Hfq. *Biochimie* **94**, 1544–53,  
377 DOI: [S0300-9084\(12\)00069-7\[pii\]10.1016/j.biochi.2012.02.010](https://doi.org/10.1016/j.biochi.2012.02.010) (2012).
- 378 8. Mandal, M. & Breaker, R. R. Gene regulation by riboswitches. *Nat Rev Mol Cell Biol* **5**, 451–63, DOI:  
379 [10.1038/nrm1403nrm1403\[pii\]](https://doi.org/10.1038/nrm1403nrm1403[pii]) (2004).
- 380 9. Coppins, R. L., Hall, K. B. & Groisman, E. A. The intricate world of riboswitches. *Curr Opin Microbiol* **10**,  
381 176–81, DOI: [S1369-5274\(07\)00023-9\[pii\]10.1016/j.mib.2007.03.006](https://doi.org/10.1016/j.mib.2007.03.006) (2007).
- 382 10. Repoila, F. & Darfeuille, F. Small regulatory non-coding RNAs in bacteria: physiology and mechanistic aspects.  
383 *Biol Cell* **101**, 117–31, DOI: [BC20070137\[pii\]10.1042/BC20070137](https://doi.org/10.1042/BC20070137) (2009).

- 384 **11.** Kozak, M. Regulation of translation via mRNA structure in prokaryotes and eukaryotes. *Gene* **361**, 13–37, DOI:  
385 [S0378-1119\(05\)00434-8\[pii\]10.1016/j.gene.2005.06.037](https://doi.org/10.1016/j.gene.2005.06.037) (2005).
- 386 **12.** Steitz, J. A. & Jakes, K. How ribosomes select initiator regions in mRNA: base pair formation between the 3'  
387 terminus of 16s rRNA and the mRNA during initiation of protein synthesis in *Escherichia coli*. *Proc Natl Acad*  
388 *Sci U S A* **72**, 4734–8 (1975).
- 389 **13.** Proshkin, S., Rahmouni, A. R., Mironov, A. & Nudler, E. Cooperation between translating ribosomes and RNA  
390 polymerase in transcription elongation. *Science* **328**, 504–8, DOI: [328/5977/504\[pii\]10.1126/science.1184939](https://doi.org/10.1126/science.1184939)  
391 (2010).
- 392 **14.** Yarchuk, O., Jacques, N., Guillerez, J. & Dreyfus, M. Interdependence of translation, transcription and mRNA  
393 degradation in the lacZ gene. *J. Mol. Biol.* **226**, 581–596, DOI: [10.1016/0022-2836\(92\)90617-S](https://doi.org/10.1016/0022-2836(92)90617-S) (1992).
- 394 **15.** Kosuri, S. *et al.* Composability of regulatory sequences controlling transcription and translation in *Escherichia*  
395 *coli*. *Proc Natl Acad Sci U S A* **110**, 14024–14029, DOI: [1301301110\[pii\]10.1073/pnas.1301301110](https://doi.org/10.1073/pnas.1301301110) (2013).
- 396 **16.** Boël, G. *et al.* Codon influence on protein expression in *E. coli* correlates with mRNA levels. *Nature* **529**,  
397 358–363, DOI: [10.1038/nature16509](https://doi.org/10.1038/nature16509) (2016).
- 398 **17.** Cambray, G., Guimaraes, J. C. & Arkin, A. P. Evaluation of 244,000 synthetic sequences reveals design  
399 principles to optimize translation in *Escherichia coli*. *Nat. Biotechnol.* **36**, 1005–1015, DOI: [10.1038/nbt.4238](https://doi.org/10.1038/nbt.4238)  
400 (2018).
- 401 **18.** Berg, L., Lale, R., Bakke, I., Burroughs, N. & Valla, S. The expression of recombinant genes in *Escherichia coli*  
402 can be strongly stimulated at the transcript production level by mutating the DNA-region corresponding to the  
403 5'-untranslated part of mRNA. *Microb Biotechnol* **2**, 379–89, DOI: [10.1111/j.1751-7915.2009.00107.x](https://doi.org/10.1111/j.1751-7915.2009.00107.x) (2009).
- 404 **19.** Nouaille, S. *et al.* The stability of an mRNA is influenced by its concentration: a potential physical mechanism  
405 to regulate gene expression. *Nucleic Acids Res.* **45**, 11711–11724, DOI: [10.1093/nar/gkx781](https://doi.org/10.1093/nar/gkx781) (2017).
- 406 **20.** Pflieger, B. F., Pitera, D. J., Smolke, C. D. & Keasling, J. D. Combinatorial engineering of intergenic regions in  
407 operons tunes expression of multiple genes. *Nat Biotechnol* **24**, 1027–32, DOI: [nbt1226\[pii\]10.1038/nbt1226](https://doi.org/10.1038/nbt1226)  
408 (2006).
- 409 **21.** Levin-Karp, A. *et al.* Quantifying translational coupling in *E. coli* synthetic operons using RBS modulation and  
410 fluorescent reporters. *ACS Synth Biol* [**ahead of print**], DOI: [10.1021/sb400002n](https://doi.org/10.1021/sb400002n) (2013).
- 411 **22.** Mutalik, V. K. *et al.* Precise and reliable gene expression via standard transcription and translation initiation  
412 elements. *Nat Methods* **10**, 354–60, DOI: [nmeth.2404\[pii\]10.1038/nmeth.2404](https://doi.org/10.1038/nmeth.2404) (2013).
- 413 **23.** Na, D., Lee, S. & Lee, D. Mathematical modeling of translation initiation for the estimation of its efficiency to  
414 computationally design mRNA sequences with desired expression levels in prokaryotes. *BMC Syst Biol* **4**, 71,  
415 DOI: [1752-0509-4-71\[pii\]10.1186/1752-0509-4-71](https://doi.org/10.1186/1752-0509-4-71) (2010).
- 416 **24.** Salis, H. M., Mirsky, E. A. & Voigt, C. A. Automated design of synthetic ribosome binding sites to control  
417 protein expression. *Nat Biotechnol* **27**, 946–50, DOI: [nbt.1568\[pii\]10.1038/nbt.1568](https://doi.org/10.1038/nbt.1568) (2009).

- 418 **25.** Seo, S. W. *et al.* Predictive design of mRNA translation initiation region to control prokaryotic translation  
419 efficiency. *Metab Eng* **15**, 67–74, DOI: [S1096-7176\(12\)00118-8\[pii\]10.1016/j.ymben.2012.10.006](https://doi.org/10.1016/j.ymben.2012.10.006) (2013).
- 420 **26.** Qi, L., Haurwitz, R. E., Shao, W., DouDNA, J. A. & Arkin, A. P. RNA processing enables predictable  
421 programming of gene expression. *Nat Biotechnol* **30**, 1002–6, DOI: [nbt.2355\[pii\]10.1038/nbt.2355](https://doi.org/10.1038/nbt.2355) (2012).
- 422 **27.** Cardinale, S. & Arkin, A. P. Contextualizing context for synthetic biology - identifying causes of failure of  
423 synthetic biological systems. *Biotechnol. J.* **7**, 856–866, DOI: [10.1002/biot.201200085](https://doi.org/10.1002/biot.201200085) (2012).
- 424 **28.** Nickel, P. I. & de Lorenzo, V. *Pseudomonas putida* as a functional chassis for industrial biocatalysis: From native  
425 biochemistry to trans-metabolism. *Metab. Eng.* **50**, 142–155, DOI: [10.1016/j.ymben.2018.05.005](https://doi.org/10.1016/j.ymben.2018.05.005) (2018).
- 426 **29.** Heggeset, T. M. *et al.* Combinatorial mutagenesis and selection of improved signal sequences and their  
427 application for high-level production of translocated heterologous proteins in *Escherichia coli*. *Appl Environ*  
428 *Microbiol* **79**, 559–68, DOI: [AEM.02407-12\[pii\]10.1128/AEM.02407-12](https://doi.org/10.1128/AEM.02407-12) (2012).
- 429 **30.** Lale, R. *et al.* Continuous control of the flow in biochemical pathways through 5' untranslated region sequence  
430 modifications in mRNA expressed from the broad-host-range promoter *Pm*. *Appl Environ Microbiol* **77**,  
431 2648–55, DOI: [AEM.02091-10\[pii\]10.1128/AEM.02091-10](https://doi.org/10.1128/AEM.02091-10) (2011).
- 432 **31.** Lale, R., Brautaset, T. & Valla, S. Broad-Host-Range Plasmid Vectors for Gene Expression in Bacteria. In  
433 Williams, J. A. (ed.) *Strain Engineering*, no. 765 in *Methods in Molecular Biology*, 327–343 (Humana Press,  
434 2011). 00008.
- 435 **32.** Kucharova, V. *et al.* Non-Invasive Analysis of Recombinant mRNA Stability in *Escherichia coli* by a Combina-  
436 tion of Transcriptional Inducer Wash-Out and qRT-PCR. *PLOS ONE* **8**, e66429, DOI: [10.1371/journal.pone.](https://doi.org/10.1371/journal.pone.0066429)  
437 [0066429](https://doi.org/10.1371/journal.pone.0066429) (2013).
- 438 **33.** Sambrook, J., Fritsch, E. F. & Maniatis, T. *Molecular cloning: a laboratory manual*. (Cold Spring Harbor  
439 Laboratory Press, New York, 1989), 2nd edn.
- 440 **34.** Hanahan, D., Jessee, J. & Bloom, F. R. Plasmid transformation of *Escherichia coli* and other bacteria. *Methods*  
441 *Enzym.* **204**, 63–113, DOI: [0076-6879\(91\)04006-A\[pii\]](https://doi.org/10.1016/0076-6879(91)04006-A) (1991).
- 442 **35.** Bakke, I. *et al.* Random mutagenesis of the *Pm* promoter as a powerful strategy for improvement of recombinant-  
443 gene expression. *Appl Environ Microbiol* **75**, 2002–11, DOI: [AEM.02315-08\[pii\]10.1128/AEM.02315-08](https://doi.org/10.1128/AEM.02315-08)  
444 (2009).
- 445 **36.** Balzer, S. *et al.* A comparative analysis of the properties of regulated promoter systems commonly used for  
446 recombinant gene expression in *Escherichia coli*. *Microb Cell Fact* (2013).
- 447 **37.** Winther-Larsen, H. C., Blatny, J. M., Valand, B., Brautaset, T. & Valla, S. *Pm* promoter expression mutants and  
448 their use in broad-host-range rk2 plasmid vectors. *Metab Eng* **2**, 92–103, DOI: [S1096-7176\(99\)90143-X\[pii\]10.](https://doi.org/10.1006/mben.1999.0143)  
449 [1006/mben.1999.0143](https://doi.org/10.1006/mben.1999.0143) (2000).

## 450 **Acknowledgements**

451 Authors would like to thank Laila Berg, for giving valuable technical advice for the library construction and  
452 screening; Svein Valla (deceased), for his involvement in an earlier version of the manuscript.

453 This work was supported by the Faculty of Natural Sciences at the Norwegian University of Science and  
454 Technology, Trondheim, Norway (personal PhD stipend that SB received) and the Norwegian Research Council  
455 grant numbers 192432 and 192123.

## 456 **Author contributions statement**

457 RL conceived the study. SBL and RL designed the experiments. SBL, IO and JAL carried out the experiments. All  
458 authors analysed the results. SBL and RL wrote the manuscript with the help from co-authors. All authors reviewed  
459 the manuscript.

## 460 **Additional information**

461 The dual UTR concept has been patented (Application granted on July 24<sup>th</sup>, 2019).

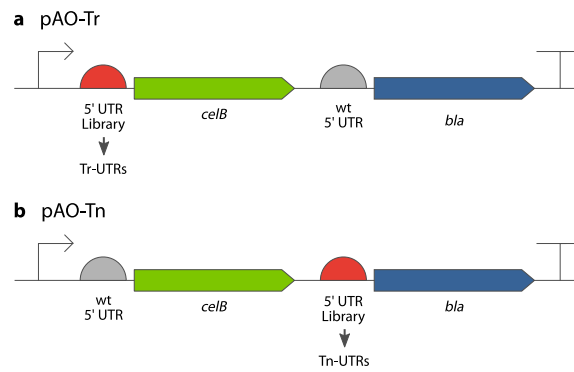

**Figure 1.** Composition of the artificial operons in plasmids pAO-Tr and pAO-Tn. The inducible *XylS/Pm* promoter system (indicated by an arrow) drives the expression in both operons, which consists of a 5' UTR; a phosphoglucomutase encoding sequence, *celB*; a spacer region; a 5' UTR; and a  $\beta$ -lactamase encoding sequence, *bla*. Two 5' UTR plasmid DNA libraries were constructed using both artificial operons, and the 5' UTR variants identified from pAO-Tr were named Tr-UTRs (a), and 5' UTR variants identified in pAO-Tn were named Tn-UTRs (b). Both artificial operons have transcription terminators on their both ends (indicated by a T). p, plasmid; AO, artificial operon; Tr, transcription; Tn, translation.

### a Tr-UTR DNA sequences

```
wt AACATGT-acaataataat ggagg tcatgaaCATATG
LV-2 AACATGT-. . . . .ca. . . . .t. . . . .CATATG
r31 AACATGTt. . . . .g. . . . . . . . . . .CATATG
r36 AACATGT-. . . . .gt. . . . .c. . . . .a. . . . .CATATG
r50 AACATGTt. . . . .c. . . . . . . . . . .t. . . . .CATATG
```

### b Tn-UTR DNA sequences

```
wt AACATGTacaataataat ggagg tcatgaaCATATG
n24 AACATGT. . . . .t. . . . .ta. . . . .c. . . . .CATATG
n44 AACATGTg. . . . .a. . . . . . . . . . .c. . . . .CATATG
n47 AACATGT.at.a.c. . . . .a. . . . .t. . . . .CATATG
n58 AACATGT. . . . .t. . . . .c. . . . .a. . . . .at. . . . .CATATG
```

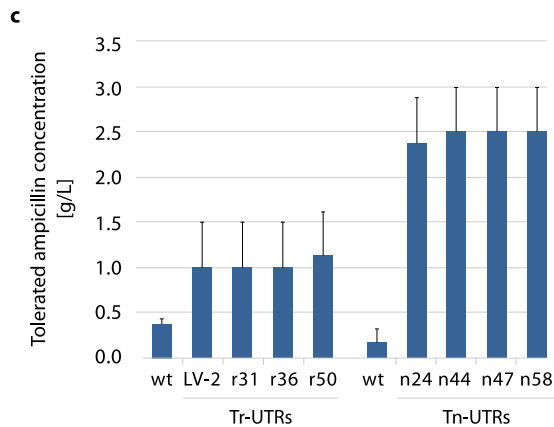

**Figure 2.** Nucleotide sequence composition and the phenotype of *E. coli* clones harbouring plasmids with different Tr- and Tn-UTRs. 5' UTR DNA variants were identified by screening pAO-Tr- and pAO-Tn-based 5' UTR libraries for increased ampicillin resistance. The 5' UTR variants r31, r36, r50 are identified from the Tr-UTR library (a); while n24, n44, n47, n58 from the Tn-UTR library (b). The 5' UTR variant LV-2 serves as an internal control that was previously shown to be leading to increase in transcription of the reporter<sup>18</sup>. Identical nucleotides are indicated by dots and point mutations are indicated with letters. Nucleotides that are not mutagenised are typed in capital letters including the PciI (ACATGT) and NdeI (CATATG) recognition sequences. The putative SD sequence (ggag) is highlighted in boldface. The ATG start codon (part of the NdeI site) is underlined. The ampicillin resistance phenotypes of the *E. coli* clones harbouring Tr- or Tn-UTR DNA sequences were characterised at the induced state with 0.1 mM *m*-toluic acid (c). This low concentration was used to make sure that resistance levels were in a range allowing us to distinguish moderate phenotypic differences among the clones. Results are presented as averages of the highest ampicillin concentrations at which growth was observed. Error bars point to the next tested ampicillin concentration at which no growth was observed.



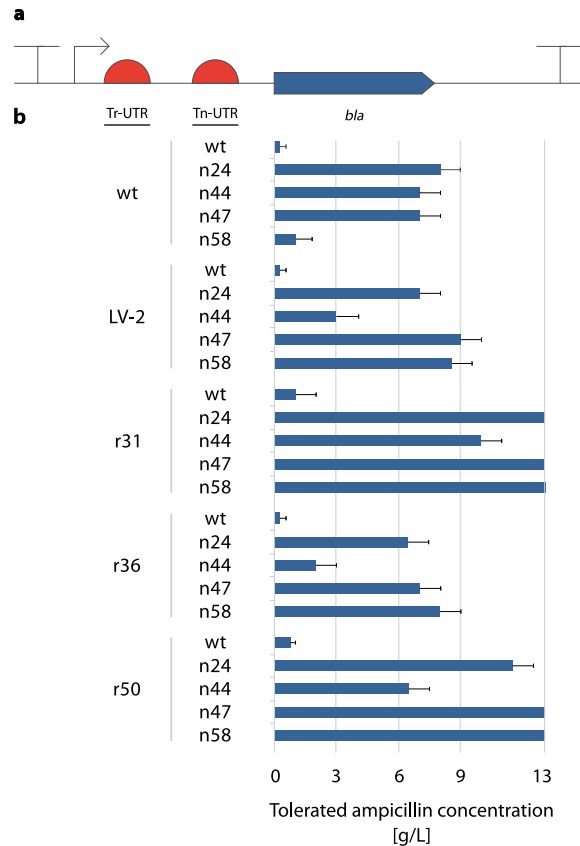

**Figure 3.** Schematic view and characterisation of ampicillin resistance phenotype in *E. coli* clones harbouring plasmids with different dual UTR constructs. The inducible XylS/Pm promoter system (indicated by an arrow) drives the expression in all constructs. The dual UTR consists of a Tr-UTR, a spacer region and a Tn-UTR (a). The ampicillin resistance phenotype of the *E. coli* clones harbouring each of the 25 dual UTR combinations were characterised using 2 mM *m*-toluic acid to provide full induction (b). Thirteen g/L ampicillin was the highest concentration tested. Error bars point to the next tested ampicillin concentration at which no growth was observed.

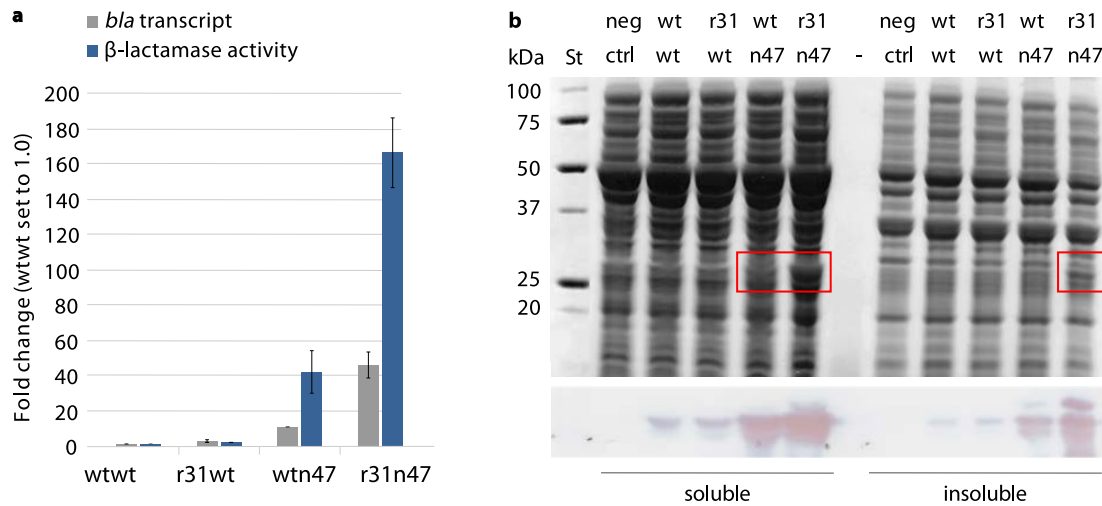

**Figure 4.** Quantification of *bla* expression levels in *E. coli* clones harbouring plasmids with different dual UTR constructs. (a) Relative *bla* transcript amounts and  $\beta$ -lactamase enzymatic activities (values for the wtwt dual UTR construct were arbitrarily set to 1.0) were determined after 5 hours of growth at the induced state with 2 mM *m*-toluic acid. (b) SDS-PAGE (top) and Western blot (bottom) images of the soluble and insoluble protein fractions of *E. coli* clones producing  $\beta$ -lactamase. Visible  $\beta$ -lactamase bands are highlighted with red rectangles. Error bars indicate the standard deviations calculated from three replicates. St: Precision Plus Dual Color Protein standard (Bio-Rad); neg ctrl: plasmid-free strain.

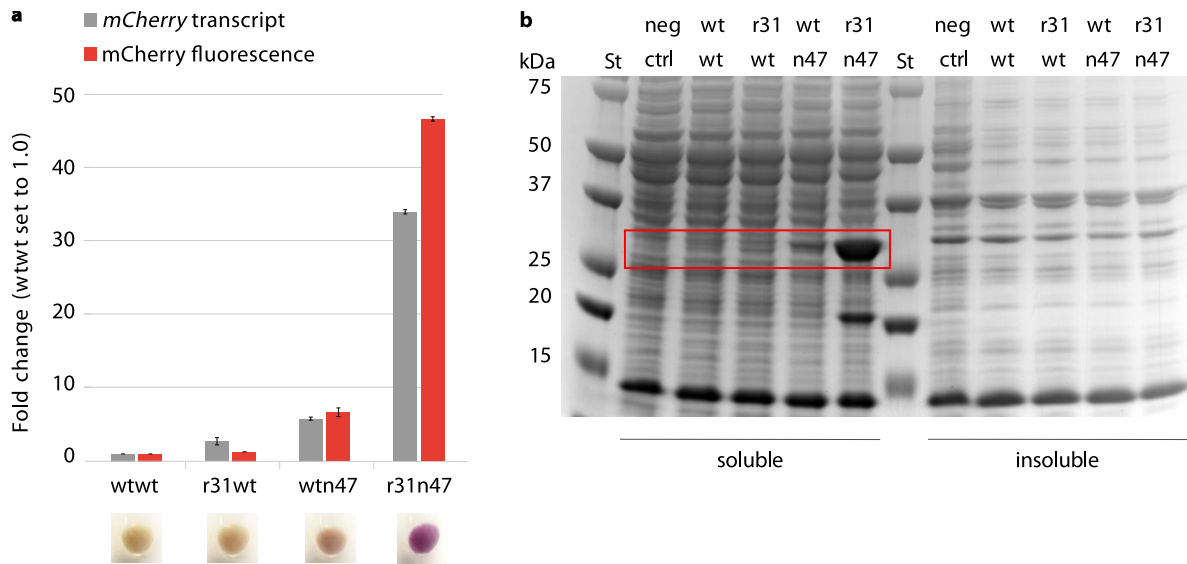

**Figure 5.** Quantification of *mCherry* expression levels in *E. coli* clones harbouring plasmids with different dual UTR constructs. (a) Relative *mCherry* transcript amounts and mCherry fluorescent intensities were quantified after 5 hours of growth at the induced state with 2 mM *m*-toluic acid. Fluorescence intensities were determined directly from the cultures and normalised with OD<sub>600</sub> values. Values for the wtw dual UTR construct were arbitrarily set to 1.0. The four images below the panel a shows bacterial pellets obtained from the four cultures indicated. Error bars indicate the standard deviations calculated from three replicates. (b) SDS-PAGE image of *E. coli* clones producing mCherry. Visible mCherry protein bands are highlighted with a red rectangle. St: Precision Plus Dual Color Protein standard (Bio-Rad); neg ctrl: plasmid-free strain.

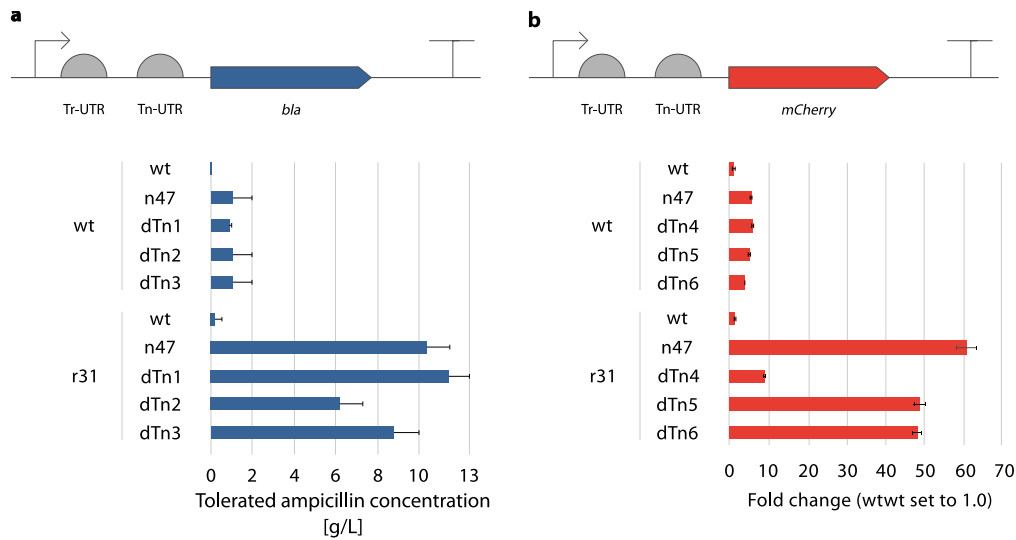

**Figure 6.** Phenotypic characterisation of the dual UTR constructs with *in silico* designed Tn-UTRs. (a) The ampicillin resistance phenotype of the *E. coli* clones harbouring each of the ten dual UTR combinations were characterised at the induced state with 0.1 mM *m*-toluic acid. The inducible XylS/*Pm* promoter system (indicated by an arrow) drives the expression in both constructs. Error bars point to the next tested ampicillin concentration at which no growth was observed. (b) mCherry fluorescent intensities were quantified after 5 hours of growth at the induced state with 2 mM *m*-toluic acid. Fluorescence intensities were determined directly from the cultures and normalised with OD<sub>600</sub> values. The fluorescent intensity value for the wtwt dual UTR construct was arbitrarily set to 1.0. Error bars indicate the standard deviations calculated from three replicates.

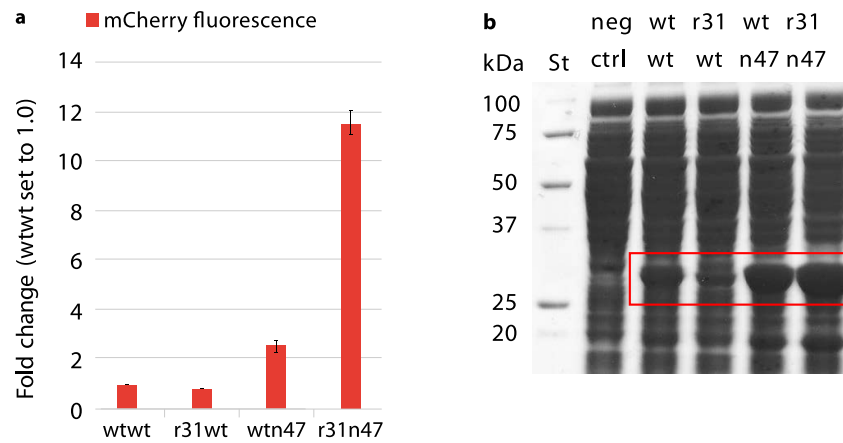

**Figure 7.** Quantification of *mCherry* expression levels in *P. putida* clones harbouring plasmids with four different dual UTR constructs. (a) Relative *mCherry* fluorescent intensities were quantified after 5 hours of growth at the induced state with 2 mM *m*-toluic acid. Fluorescence intensities were determined directly from the cultures and normalised with  $OD_{600}$  values. The fluorescent intensity value for the wtwt dual UTR was arbitrarily set to 1.0. Error bars indicate the standard deviations calculated from three replicates. (b) SDS-PAGE image of *P. putida* clones producing *mCherry*. Visible *mCherry* protein bands are highlighted with a red rectangle. St: Precision Plus Dual Color Protein standard (Bio-Rad); neg ctrl: plasmid-free strain.

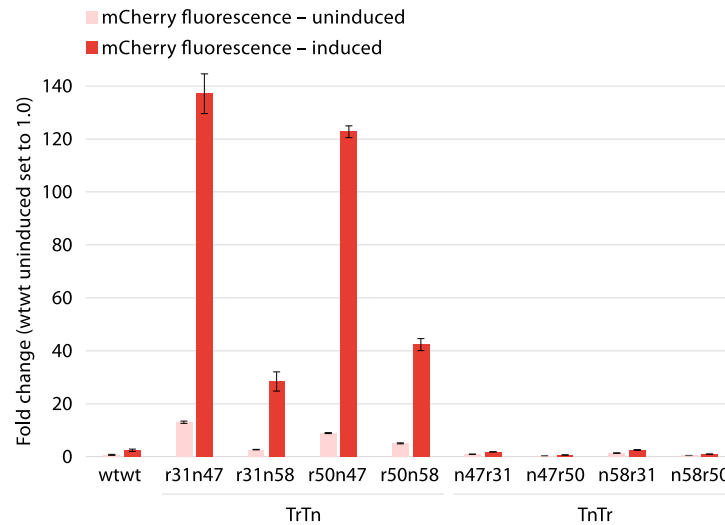

**Figure 8.** Quantification of *mCherry* expression levels in *E. coli* clones harbouring plasmids with TrTn and TnTr dual UTR constructs. Relative *mCherry* fluorescent intensities were quantified after 5 hours of growth at the induced state with 2 mM *m*-toluic acid. Fluorescence intensities were determined directly from the cultures and normalised with OD<sub>600</sub> values. The fluorescent intensity value for the wtwt dual UTR construct at the uninduced state was arbitrarily set to 1.0. Error bars indicate the standard deviations calculated from three replicates.

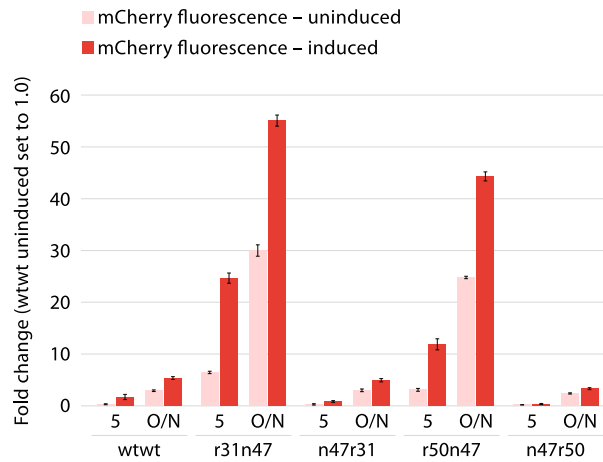

**Figure 9.** Quantification of *mCherry* expression levels under the control of the *AraC/P<sub>BAD</sub>* promoter system in *E. coli* clones harbouring plasmids with TrTn and TnTr dual UTR constructs. Relative *mCherry* fluorescent intensities were quantified after 5 hours and 18 hours of overnight (O/N) growth at the induced state with L-arabinose to a final concentration of 0.2%. Fluorescence intensities were determined directly from the cultures and normalised with OD<sub>600</sub> values. The fluorescent intensity value for the wtwt dual UTR construct at the uninduced state was arbitrarily set to 1.0. Error bars indicate the standard deviations calculated from three replicates.

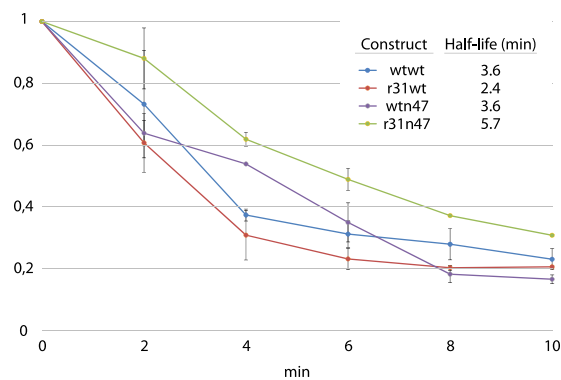

**Figure 10.** Quantification of mRNA decay rates in four dual UTR constructs in *E. coli*. *E. coli* clones were first grown for 5 hours under induced state with 2 mM *m*-toluic acid, and afterwards the growth medium was replaced with a fresh medium not containing the inducer. In total five samples were taken with 2 minutes intervals ranging from 0 to 10 minutes. qPCR analyses was performed on the samples and the mRNA decay rates were calculated for the four different dual UTR constructs.



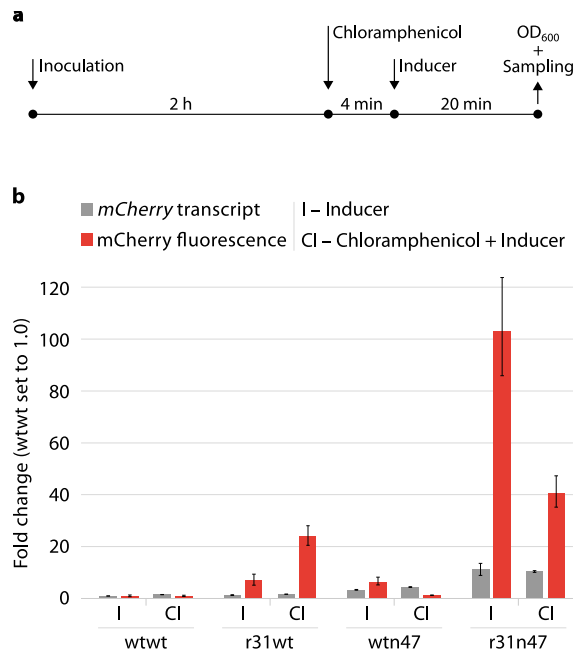

**Figure 11.** Quantification of the reporter transcript and mCherry fluorescence intensities under translational arrest. (a) The schematic view of the experimental set-up. *E. coli* clones with different dual UTR constructs were inoculated to a fresh medium and were grown for 2 hours. Afterwards it was either followed by induction of expression only with 2 mM *m*-toluic acid (I) or by the addition of chloramphenicol to a final concentration of 100 µg/mL and followed by induction of expression with 2 mM *m*-toluic acid (CI). The quantified relative *mCherry* transcript amounts and mCherry fluorescent intensities were depicted in panel b. Fluorescence intensities were determined directly from the cultures and normalised with OD<sub>600</sub> values. Values for the wtwt dual UTR construct at the condition I were arbitrarily set to 1.0. Error bars indicate the standard deviations calculated from three replicates.
